# Supplementary material
Source: publisher figshare collection journal article supplement (https://acs.figshare.com/ndownloader/files/9462331)
Supplement: Supplementary file 1 [file 9462331]

## **Supporting Information**

### **Surfactant-Free Solvothermal Synthesis of 3D Flowerlike Iron Alkoxide Fe-EG Micro/Nanostructures: Structure, Formation Mechanism, and Fenton Oxidation of Azo Dyes**

Ting Fan,<sup>1</sup> Yangguang Li, and Hui Zhang<sup>\*</sup>

State Key Laboratory of Chemical Resource Engineering, Beijing University of  
Chemical Technology, P.O. Box 98, Beijing, 100029 (P. R. China)

<sup>\*</sup> Corresponding author.

Tel.: +8610 64425872

Fax: +8610 64425385

E-mail: huizhang67@gst21.com

---

<sup>1</sup> Present address of T.F.: ShenWu Technology Group Corp., Beijing 102200, China

**Figure S1.** EDX spectrum of Fe-EG.

**Figure S2.** TG/DSC profiles of Fe-EG under N<sub>2</sub> flow.

**Figure S3.** Determination of contact angle for water of Fe-EG.

**Figure S4.** XPS spectrum of O1s for Fe-EG.

**Figure S5.** Mass spectrum of the Fe-EG-4h taken from the supernatant solution of the reaction mixture.

**Figure S6.** Photographs of ethanol suspensions for the Fe-EG-*x* samples kept after one month in desiccators.

**Figure S7.** SEM image with low magnification of Fe-EG.

**Figure S8.** Photograph of the sample collected at reaction time 0.5h.

**Figure S9.** (a) SEM image of the Fe-EG-ref, and (b) further enlarged SEM image of Fe<sub>3</sub>O<sub>4</sub> submicrospheres in the selected quadrate region of (a). (c) XRD pattern and (d) FT-IR spectrum of the Fe-EG-ref.

**Figure S10.** Effect of the catalyst dosage on AO7 degradation. Experimental conditions: [AO7] = 35 mg L<sup>-1</sup>; [H<sub>2</sub>O<sub>2</sub>] = 48.5 mM; pH = 6 and 25 °C

**Figure S11.** Effect of the reaction temperature on AO7 degradation. Experimental conditions: AO7 = 35 ppm; Dosage = 0.25 g L<sup>-1</sup>; H<sub>2</sub>O<sub>2</sub> = 48.5 mM and pH 6.0.

**Figure S12.** Recycling performance of Fe-EG for AO7 degradation.

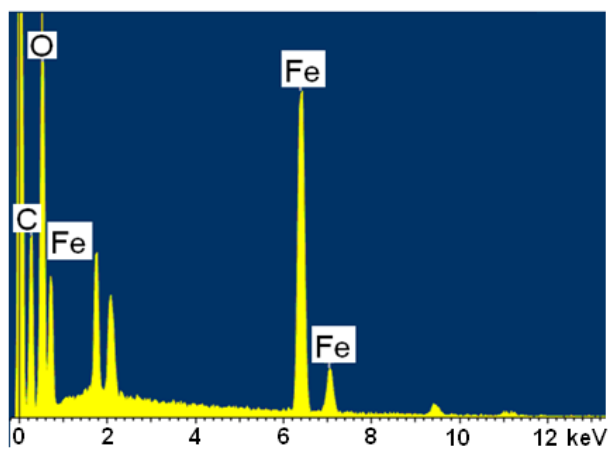

**Figure S1.** EDX spectrum of Fe-EG.

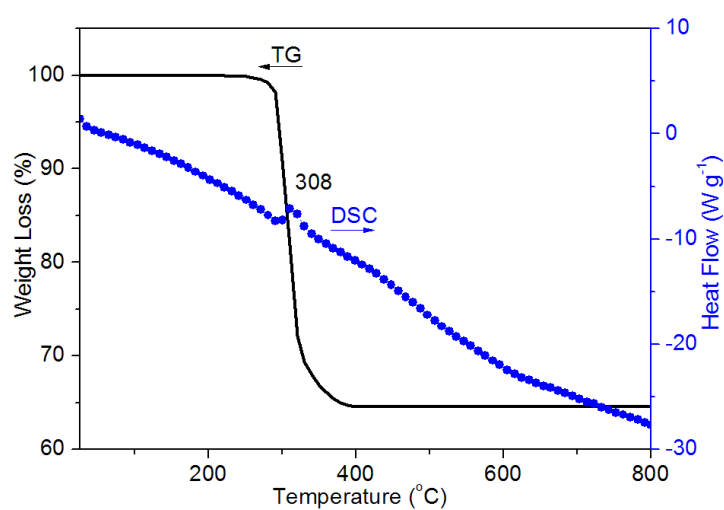

**Figure S2.** TG/DSC profiles of Fe-EG under N<sub>2</sub> flow.

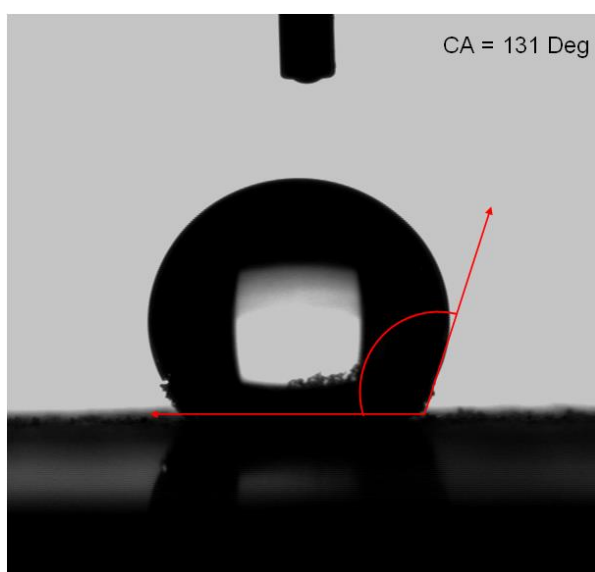

**Figure S3.** Determination of contact angle for water of Fe-EG.

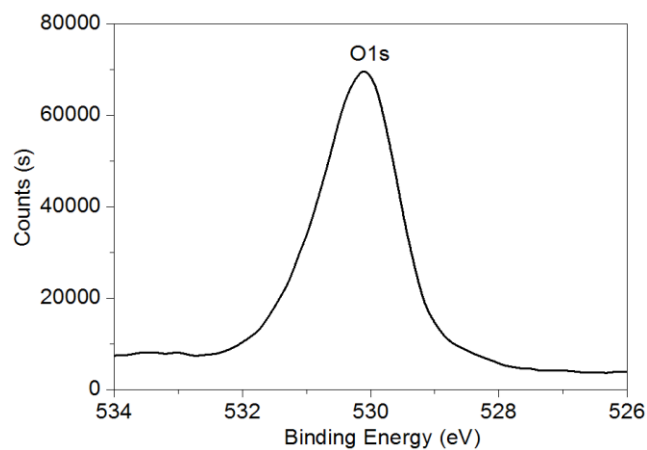

**Figure S4.** XPS spectrum of O1s for Fe-EG.

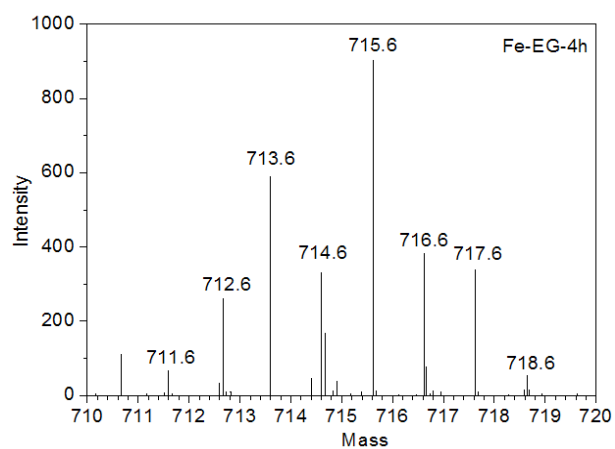

**Figure S5.** Mass spectrum of the Fe-EG-4h taken from the supernatant solution of the reaction mixture.

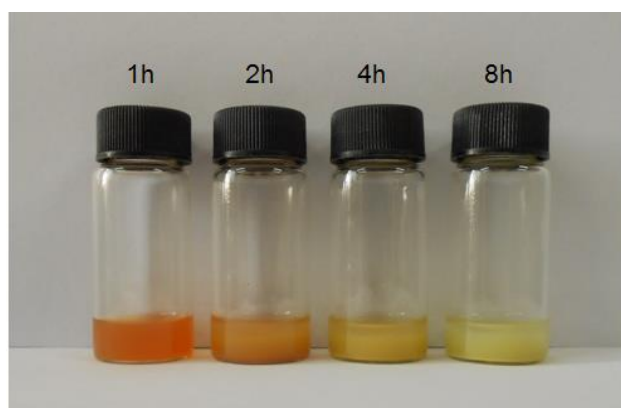

**Figure S6.** Photographs of ethanol suspensions for the Fe-EG-*x* samples kept after one month in desiccators.

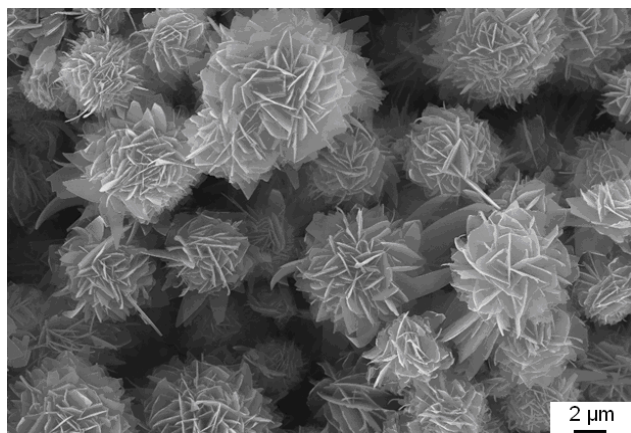

**Figure S7.** SEM image with low magnification of Fe-EG.

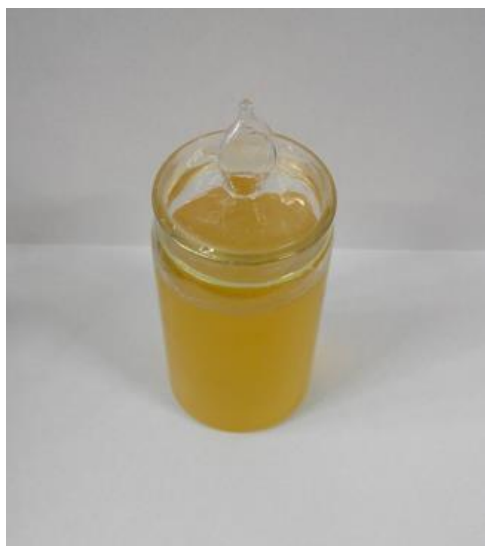

**Figure S8.** Photograph of the sample collected at reaction time 0.5 h.

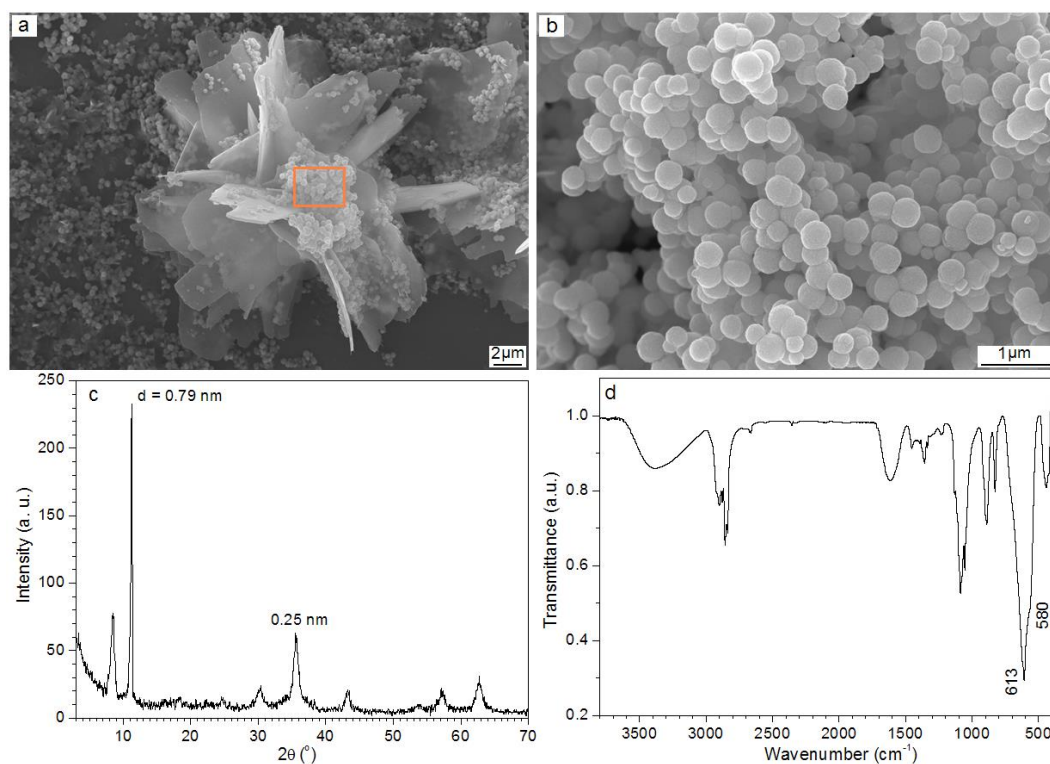

**Figure S9.** (a) SEM image of the Fe-EG-ref, and (b) further enlarged SEM image of  $\text{Fe}_3\text{O}_4$  submicrospheres in the selected quadrate region of (a). (c) XRD pattern and (d) FT-IR spectrum of the Fe-EG-ref.

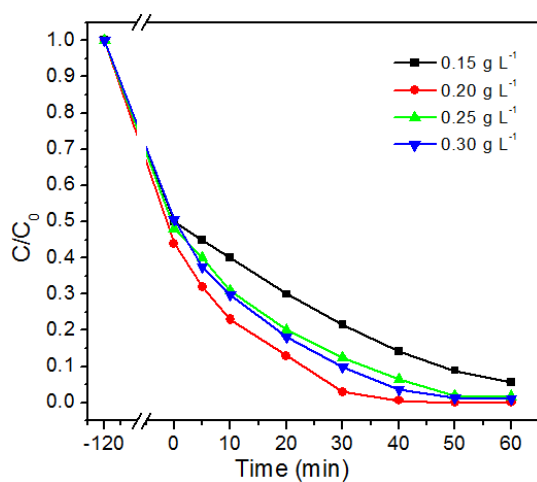

**Figure S10.** Effect of the catalyst dosage on AO7 degradation. Experimental conditions:  $[\text{AO7}] = 35 \text{ mg L}^{-1}$ ;  $[\text{H}_2\text{O}_2] = 48.5 \text{ mM}$ ;  $\text{pH} = 6$  and  $25^\circ\text{C}$

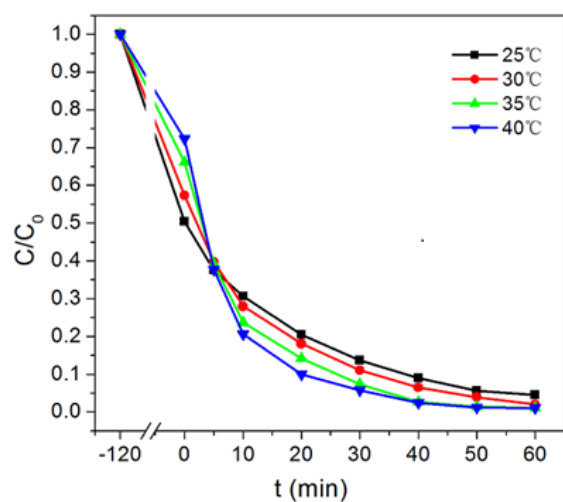

**Figure S11.** Effect of the reaction temperature on AO7 degradation. Experimental conditions: AO7 = 35 ppm; Dosage = 0.25 g L<sup>-1</sup>; H<sub>2</sub>O<sub>2</sub> = 48.5 mM and pH 6.0.

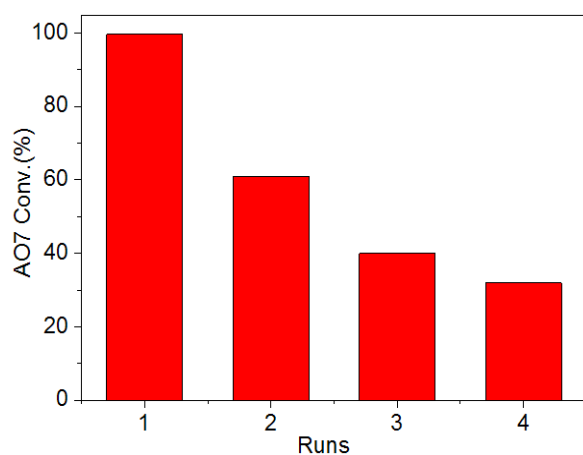

**Figure S12.** Recycling performance of Fe-EG for AO7 degradation.
